# Supplementary figures and images for: Impact of CD4 T cells on intratumoral CD8 T-cell exhaustion and responsiveness to PD-1 blockade therapy in mouse brain tumors
Source: HighWire-hosted journal article supplement (doi:10.1136/jitc-2022-005293), 2022-12-01

Cluster 3

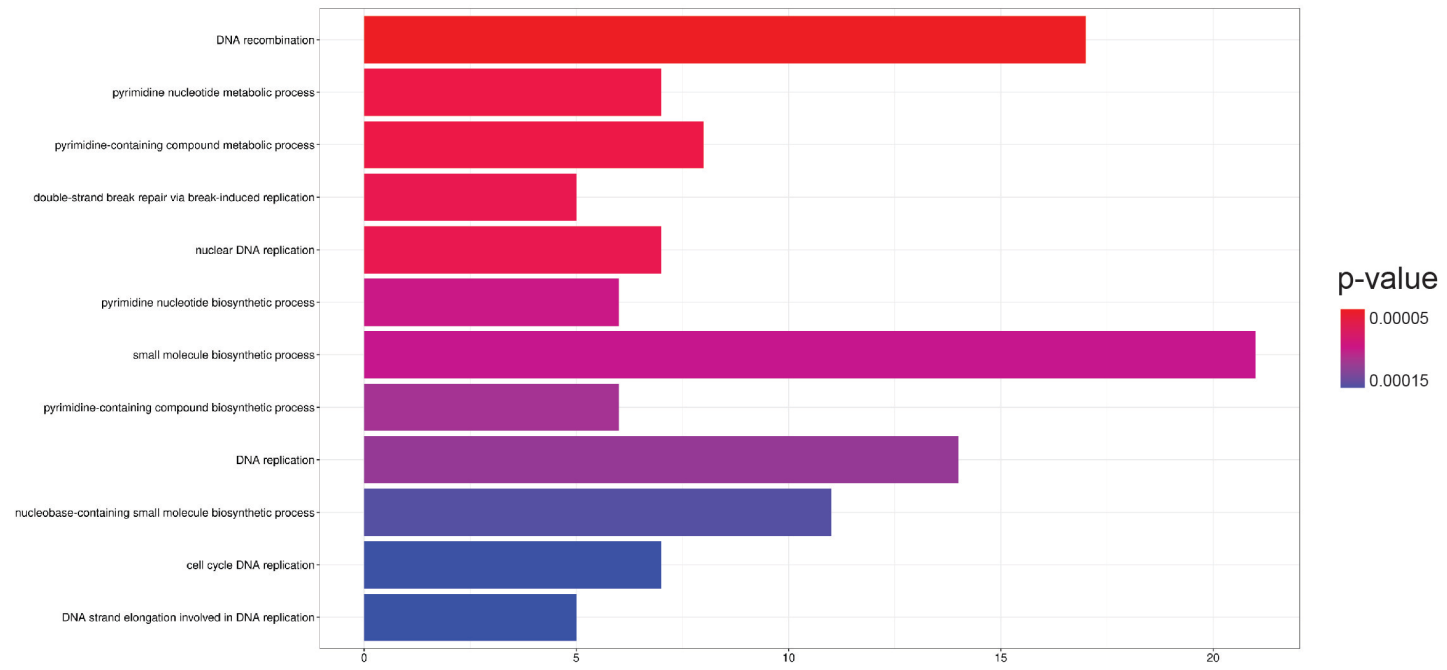

Cluster 7

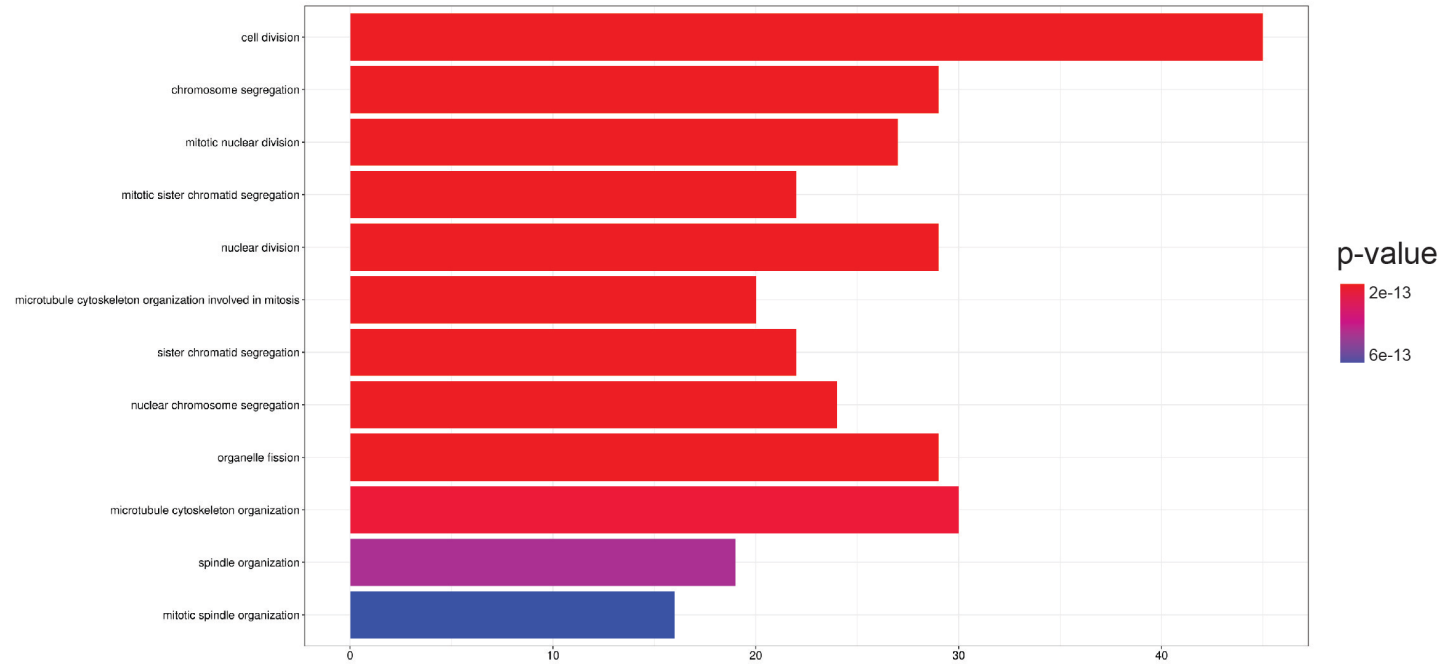

Supplement: jitc-2022-005293supp005_data_supplement.pdf [file jitc-2022-005293supp005_data_supplement.pdf]

A

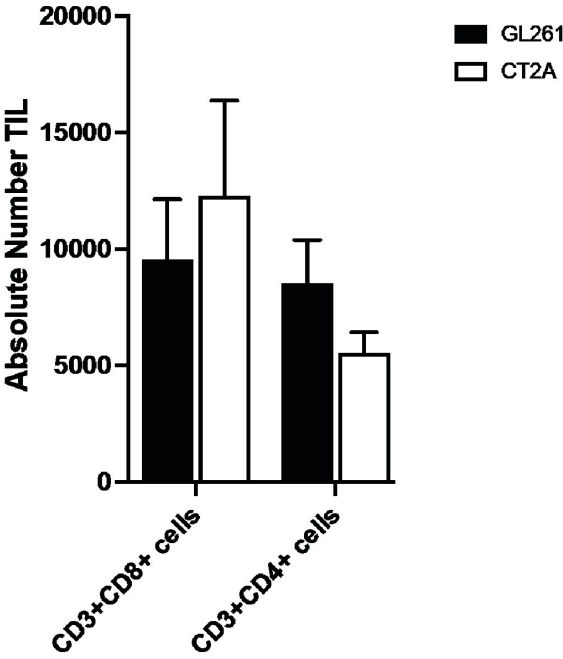

B

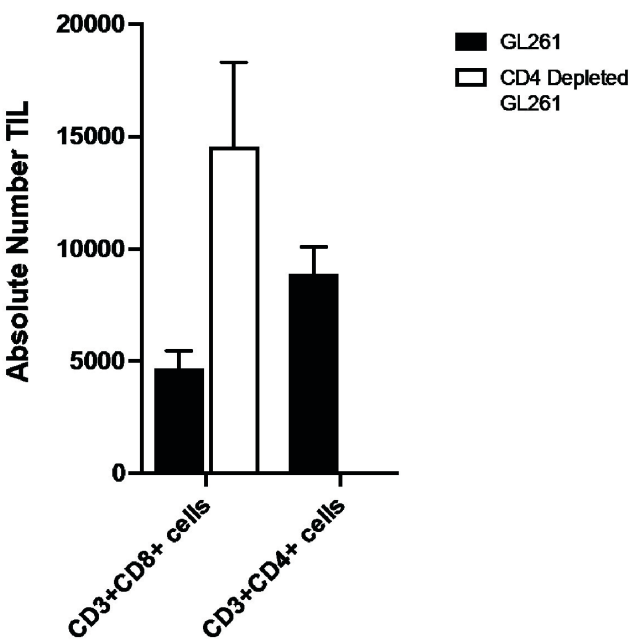

Supplement: jitc-2022-005293supp006_data_supplement.pdf [file jitc-2022-005293supp006_data_supplement.pdf]

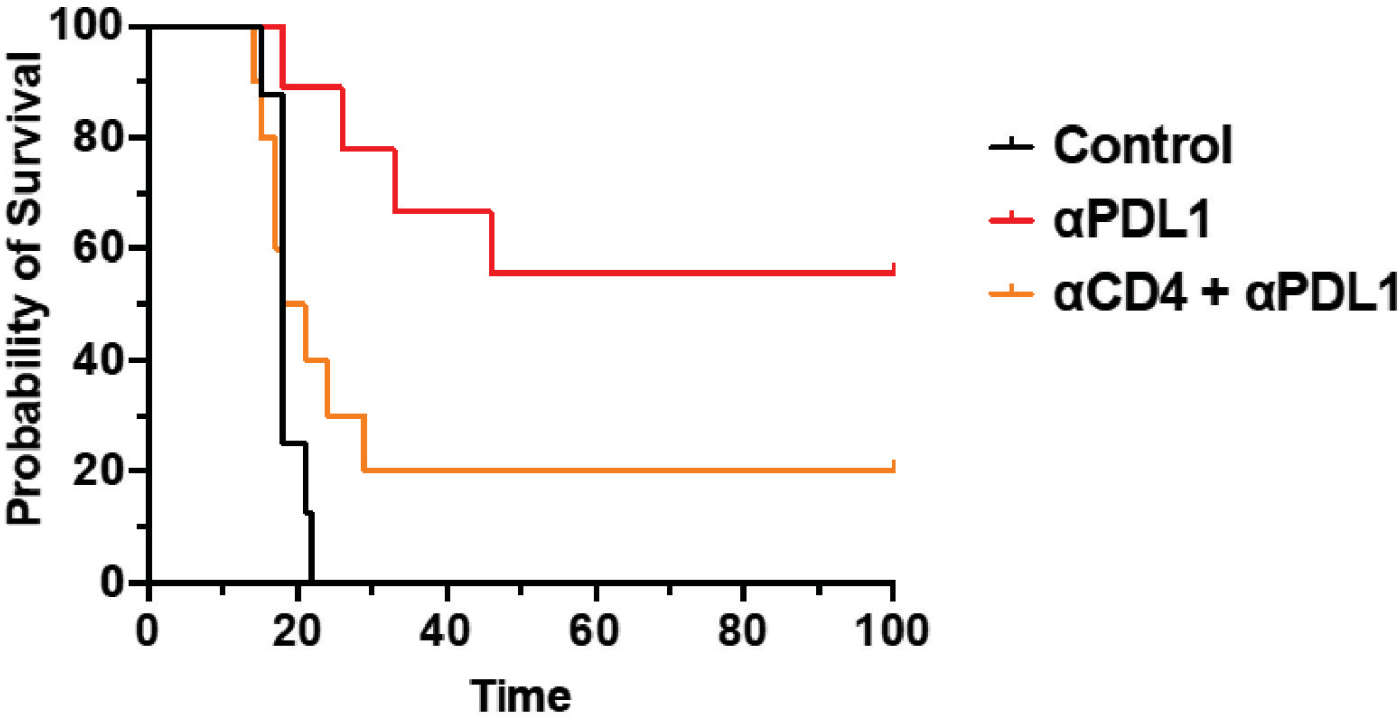

Supplement: jitc-2022-005293supp007_data_supplement.pdf [file jitc-2022-005293supp007_data_supplement.pdf]

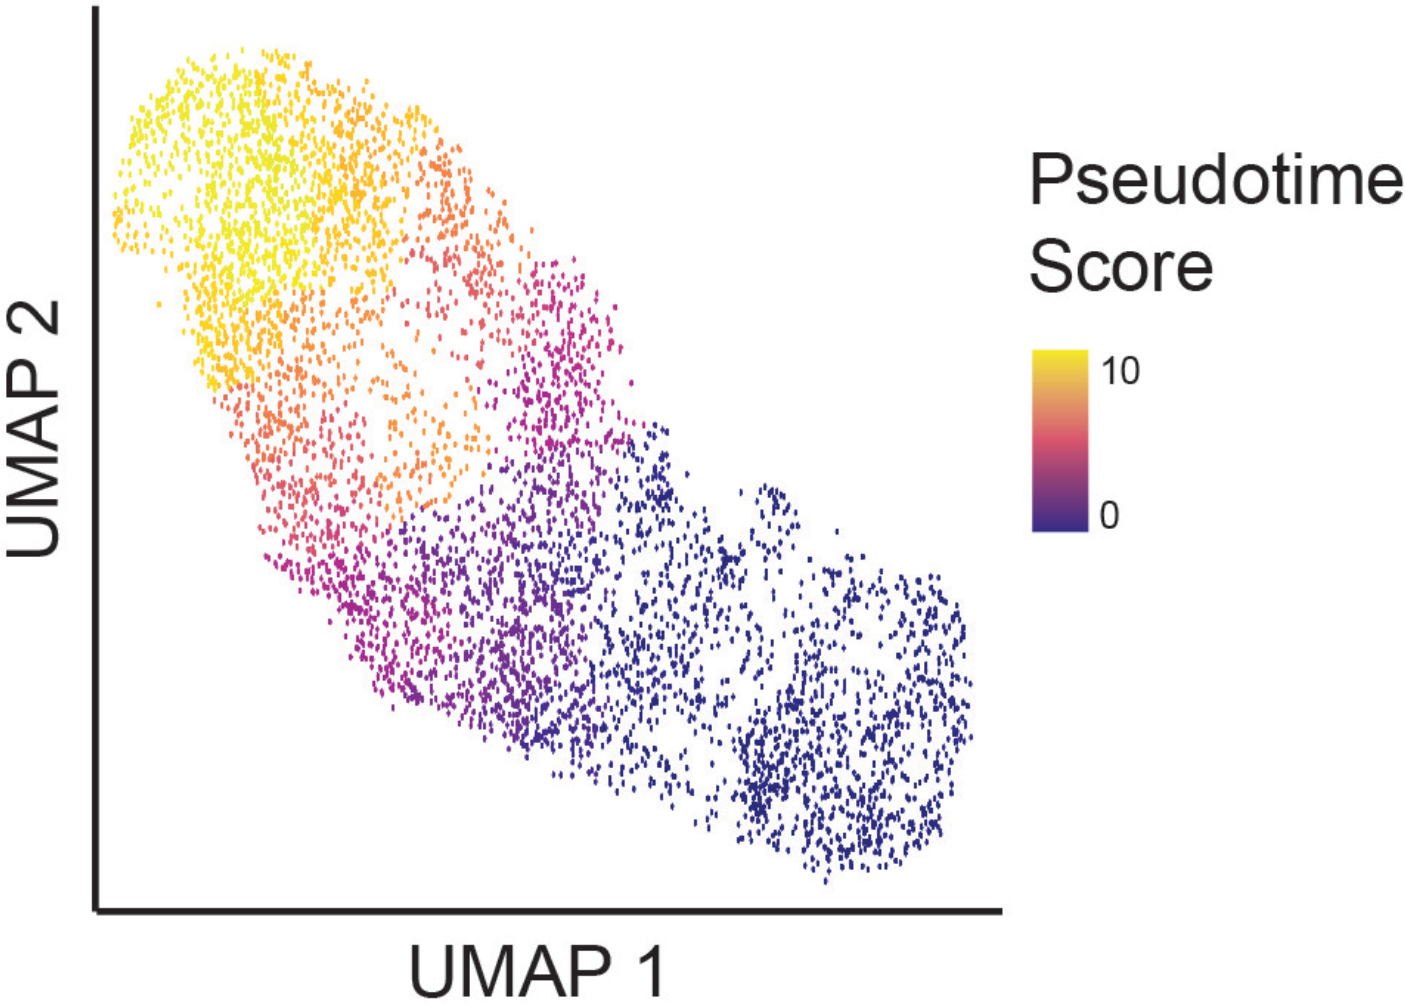

Supplement: jitc-2022-005293supp008_data_supplement.pdf [file jitc-2022-005293supp008_data_supplement.pdf]
